# Supplementary material for: Structural Conformations of Calixarene-Based Receptors and Their Implications for Molecular Recognition
Source: Preprints.org preprint supplement (doi:10.20944/preprints202408.0174.v1), 2024-08-02

## **Electronic Supporting Information**

### ***Structural conformations of calixarene-based receptors and their implications for molecular recognition.***

**Andres Ochoa<sup>1</sup>, Belen Hernandez-Arancibia<sup>1</sup>, José Herrera-Muñoz<sup>2</sup>, Horacio Gómez-Machuca<sup>1</sup> and Claudio Saitz<sup>1\*</sup>.**

1. Facultad de Ciencias Químicas y Farmacéuticas, Universidad de Chile, Olivos 1007, Independencia, Santiago, Chile.
2. Facultad de Química y Biología, Universidad de Santiago de Chile, USACH, Casilla 40, Correo 33, Santiago, Chile.

Correspondence: [clsaitz@ciq.uchile.cl](mailto:clsaitz@ciq.uchile.cl).

1.- Characterization of I; 5,17- N-(pyridin-2-yl)-2-naphthamide-thiosemicarbazone-25,27-dipropoxy- 26,28-dihydroxycalix[4]arene, pinched cone

Figure S1: Spectra for I: (a) <sup>1</sup>H NMR and (b) FT-IR.

(a) <sup>1</sup>H NMR

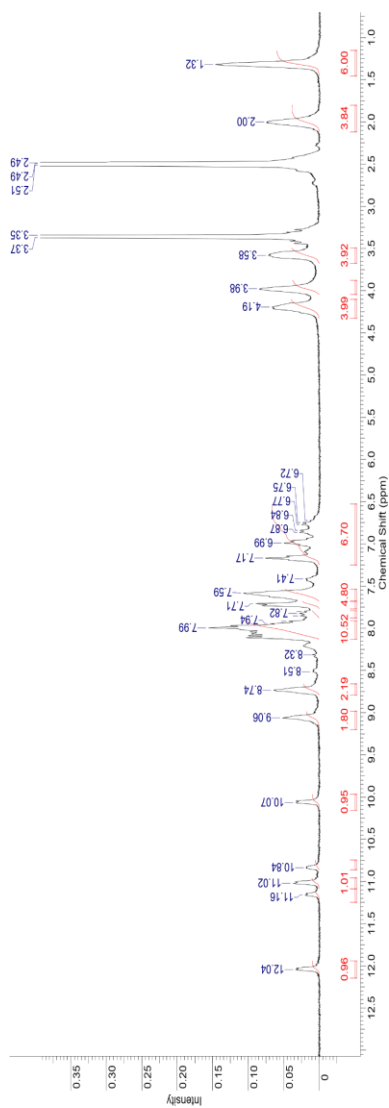

**(b) FT-IR**

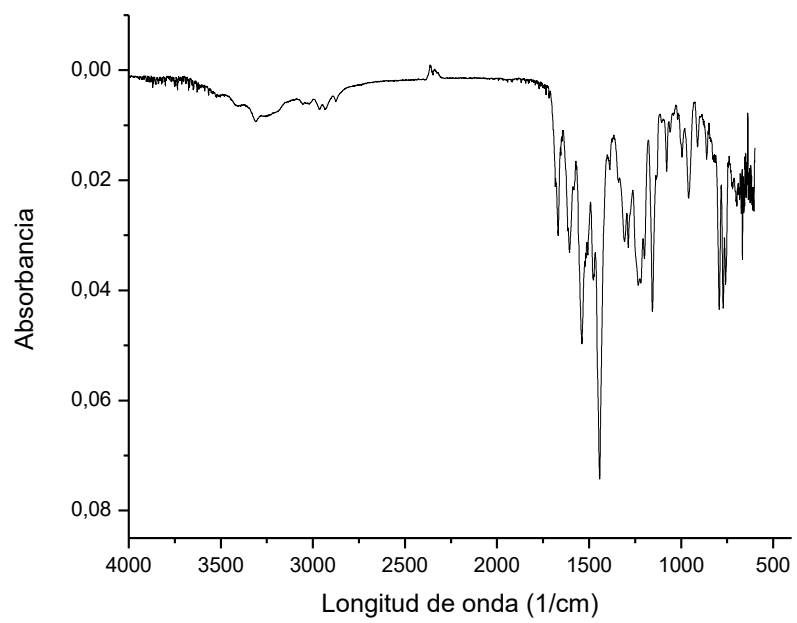

## 2.- Determination of the association constant by absorption titration.

Figure S2. The binding constant of I has been derived based on the Benesi–Hildebrand equation using absorption titration a)  $\text{Cu}^{2+}$ , b)  $\text{Ag}^+$ , c)  $\text{Ni}^{2+}$ , d)  $\text{Cd}^{2+}$ , e)  $\text{Zn}^{2+}$ , f)  $\text{F}^-$  and g)  $\text{CN}^-$ .

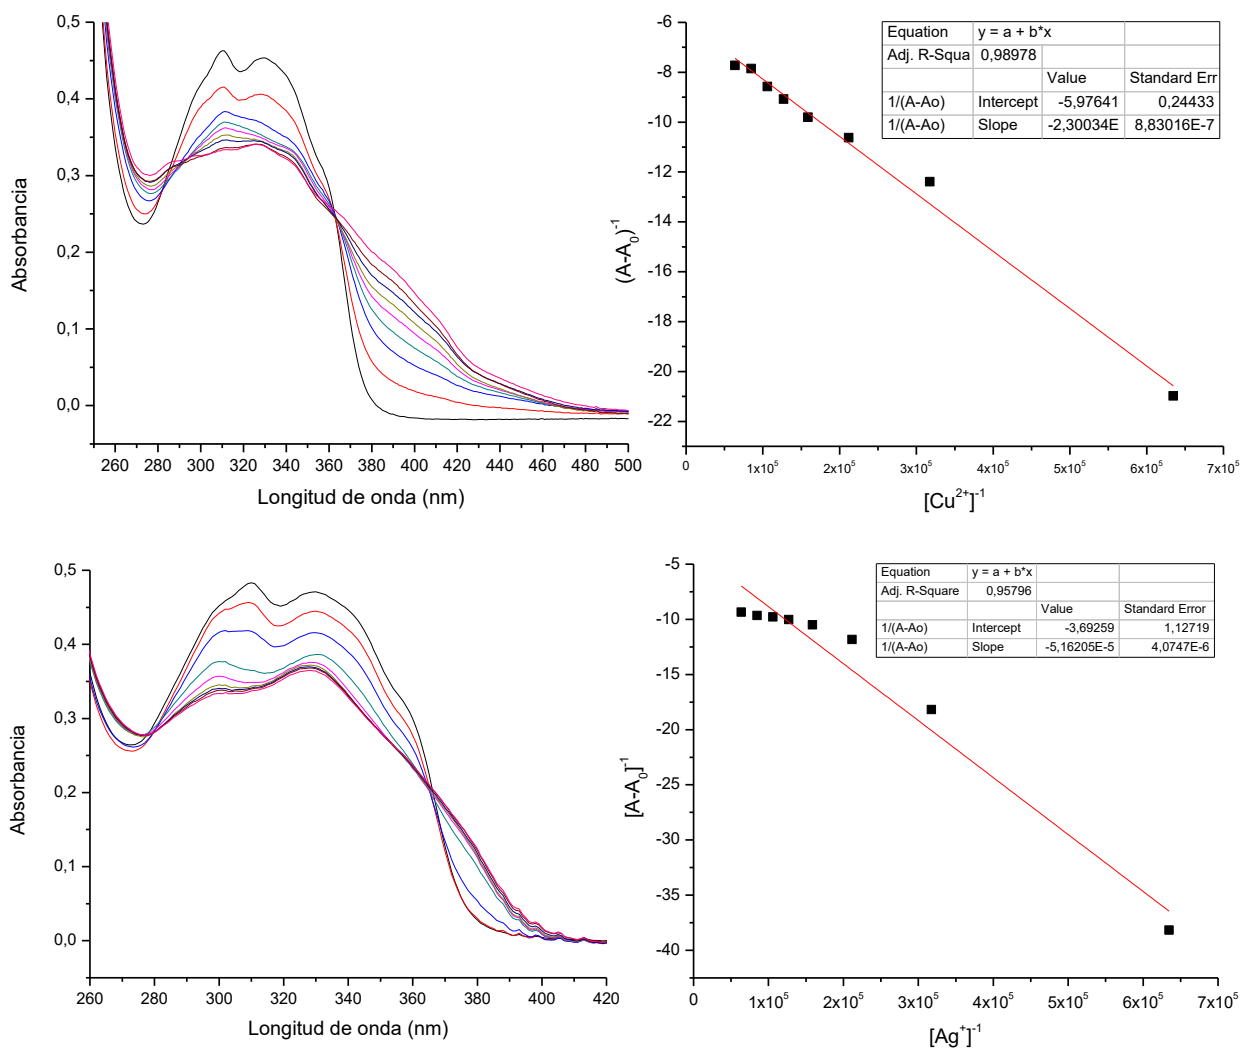

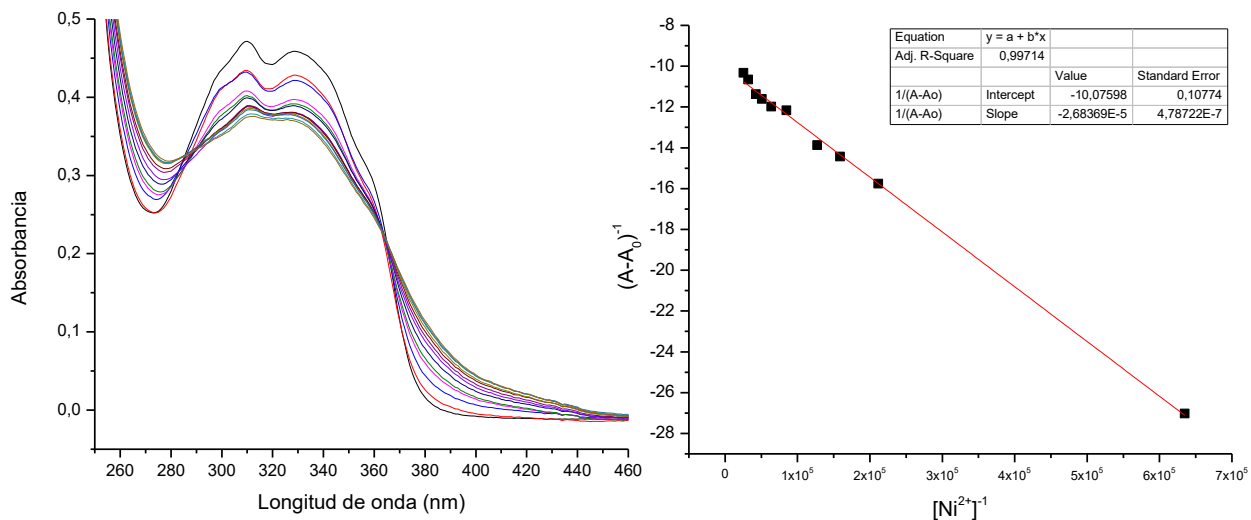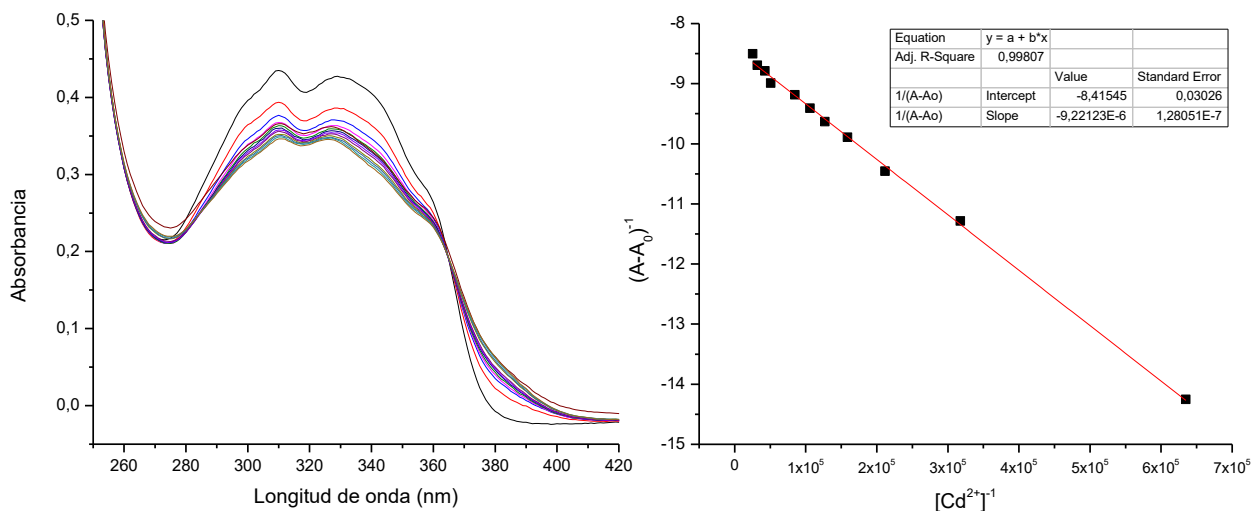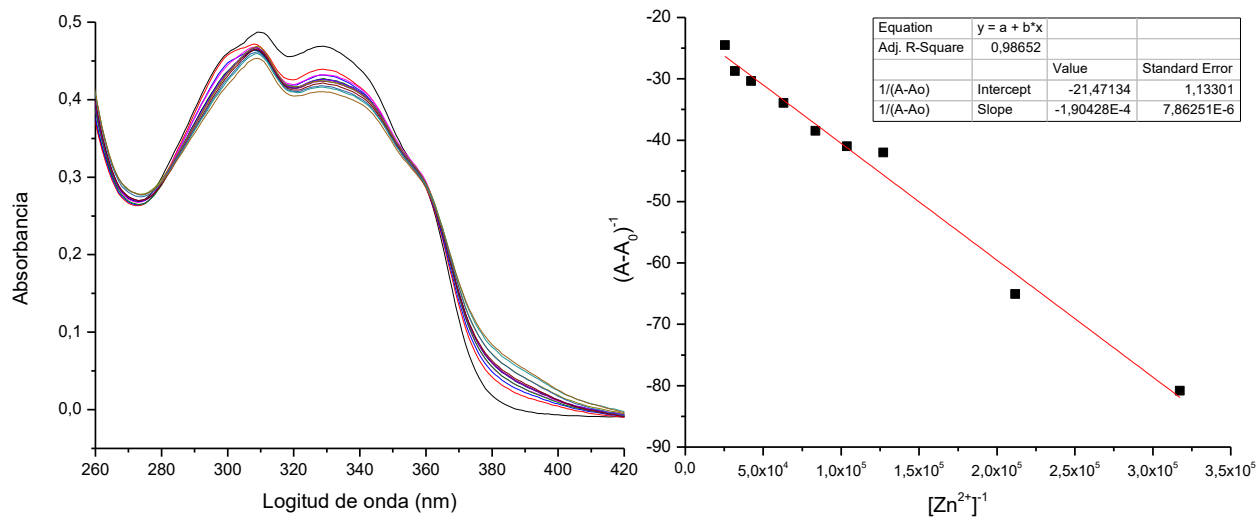

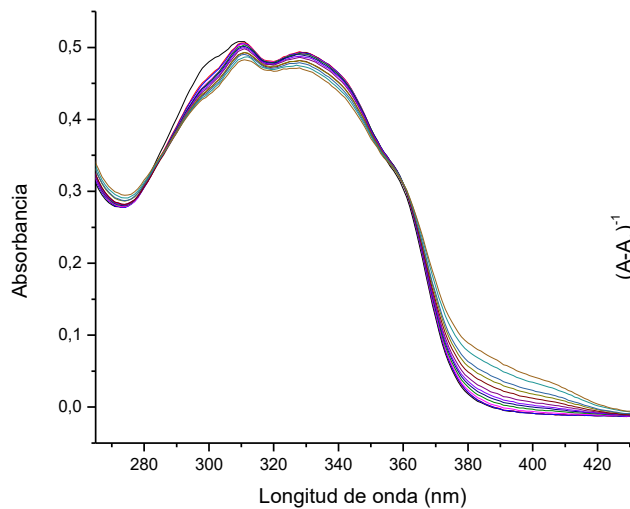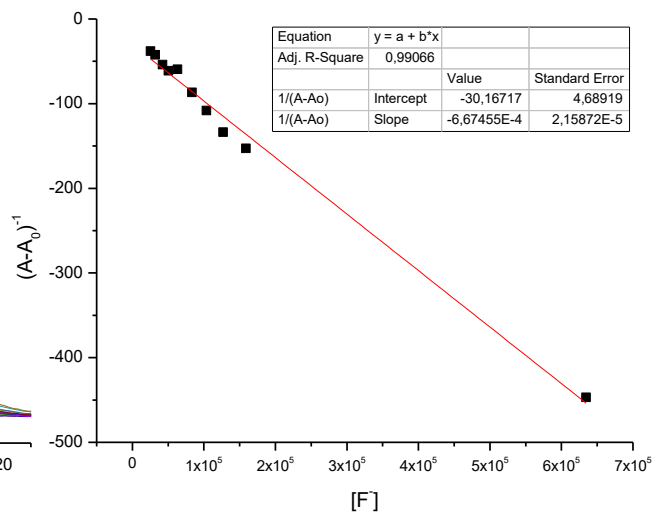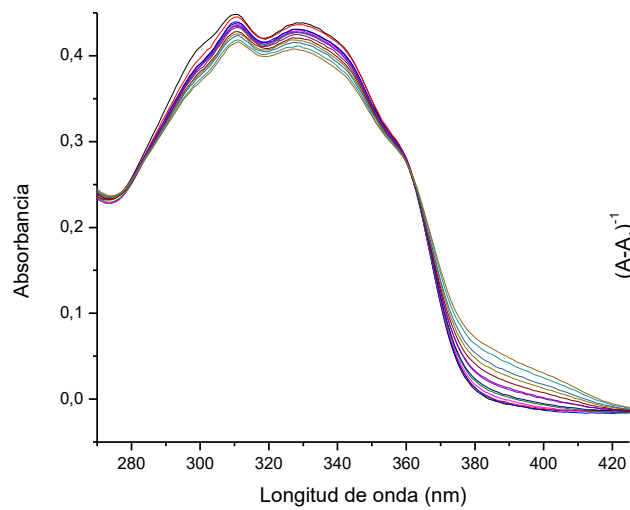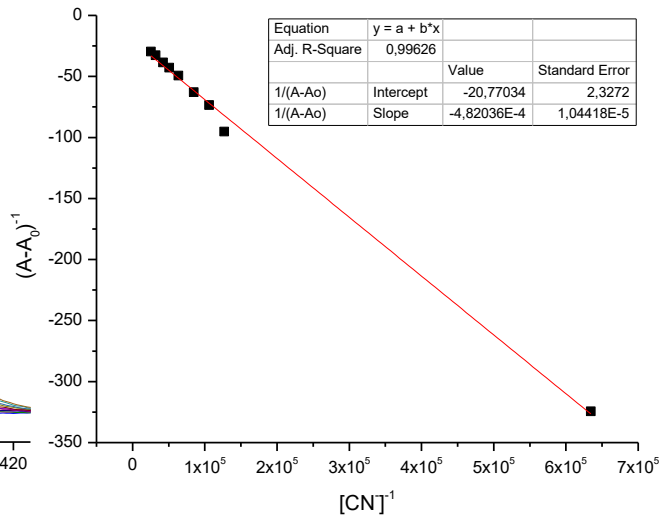

### 3.- Determination of the stoichiometry.

**Figure S3. Continuous variation plot for receptor I from absorbance measurements in CH<sub>3</sub>CN: a) Cu<sup>2+</sup>, b) Ag<sup>+</sup>, c) Ni<sup>2+</sup>, d) Cd<sup>2+</sup>, e) Zn<sup>2+</sup>, f) F<sup>-</sup> and g) CN<sup>-</sup>.**

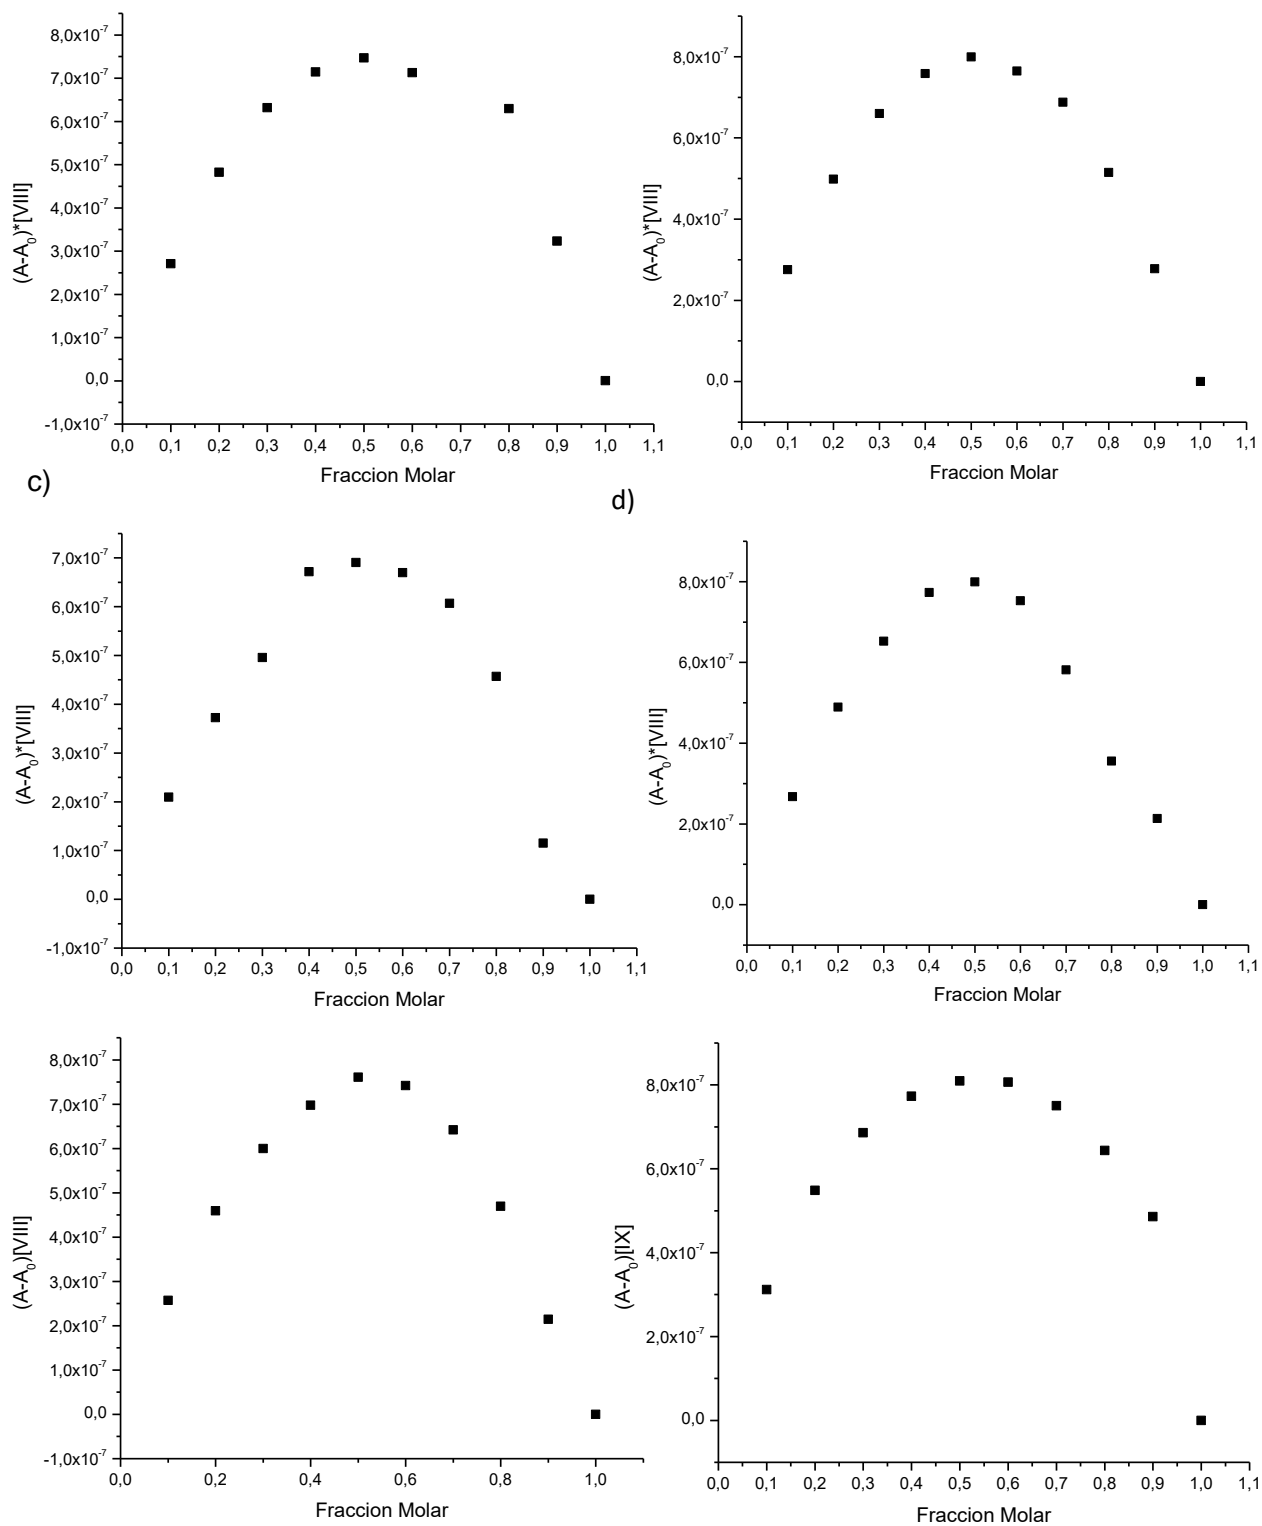

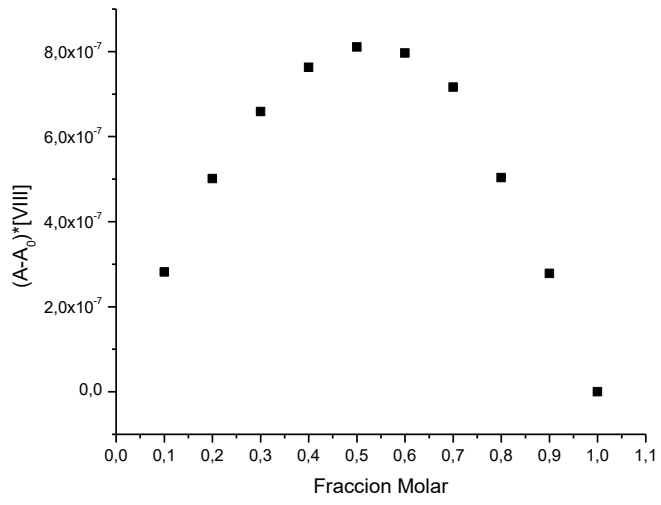

4.- Characterization of II; 25,26,27,28-tetra[3-(3-(6-(2-naphthamido)pyridin-2-yl)thioureido) propyloxy]calix[4]arene, 1,3-alternate.

Figure S1: Spectra for II: (a)  $^1\text{H}$  NMR; (b)  $^{13}\text{C}$  NMR; (c) FT-IR; and (d) ESI-TOF.

(a)  $^1\text{H}$  NMR

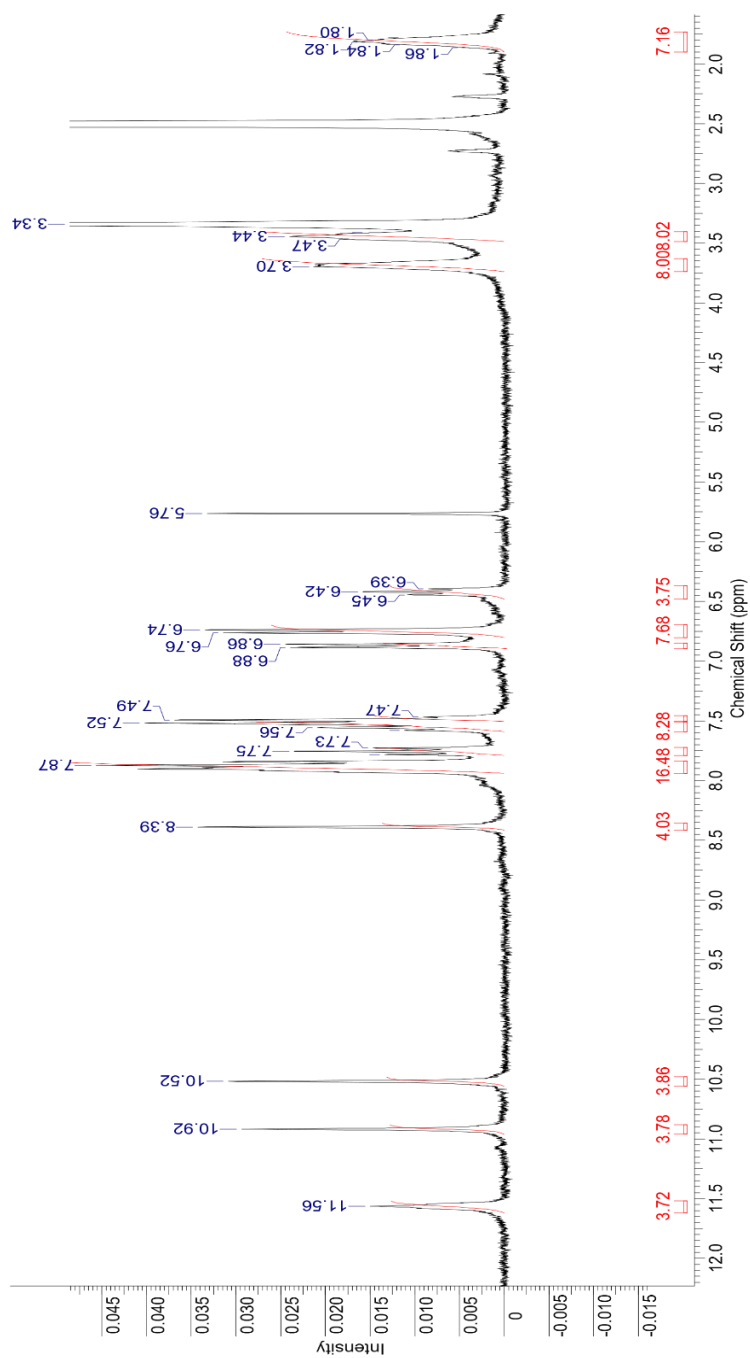

(b)  $^{13}\text{C}$  NMR

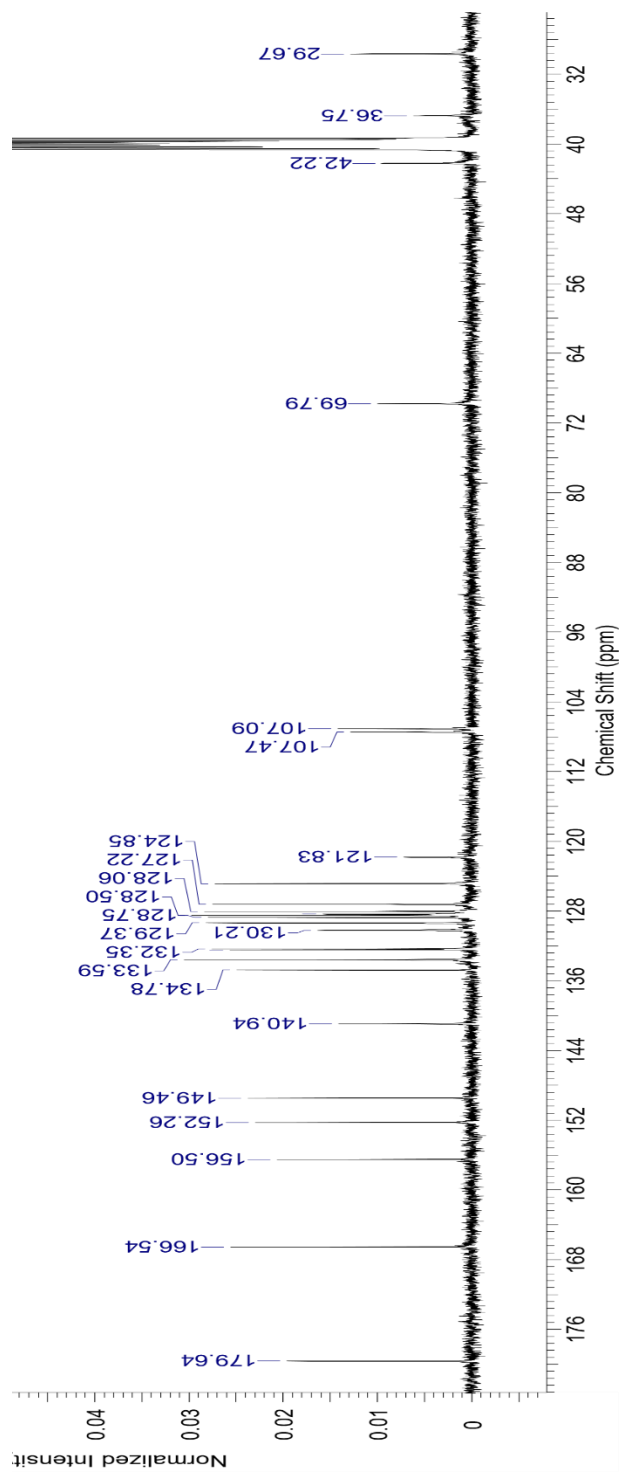

**(c) FT-IR**

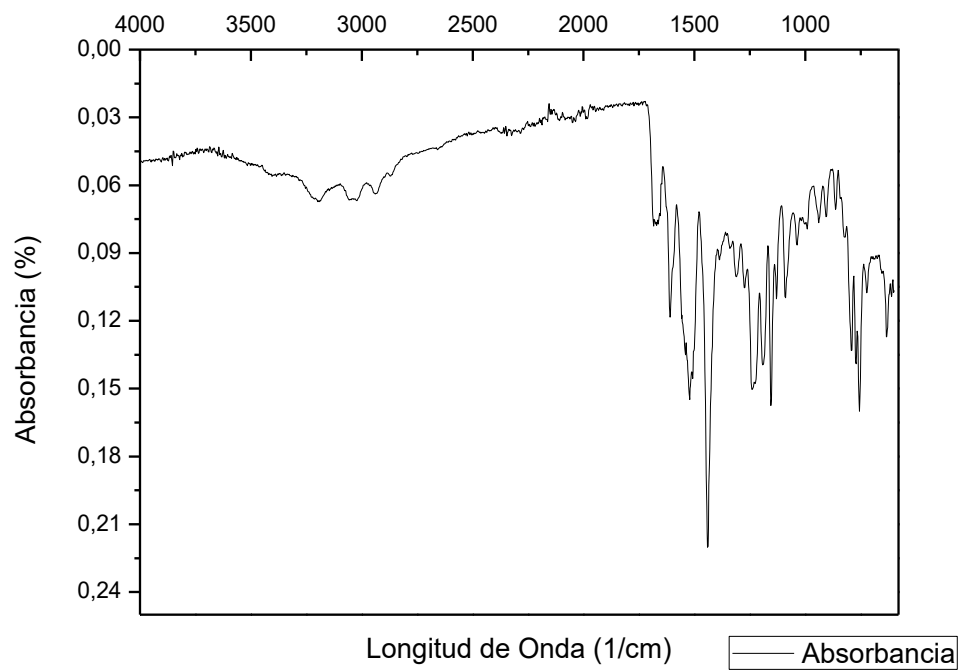

(d) ESI-TOF

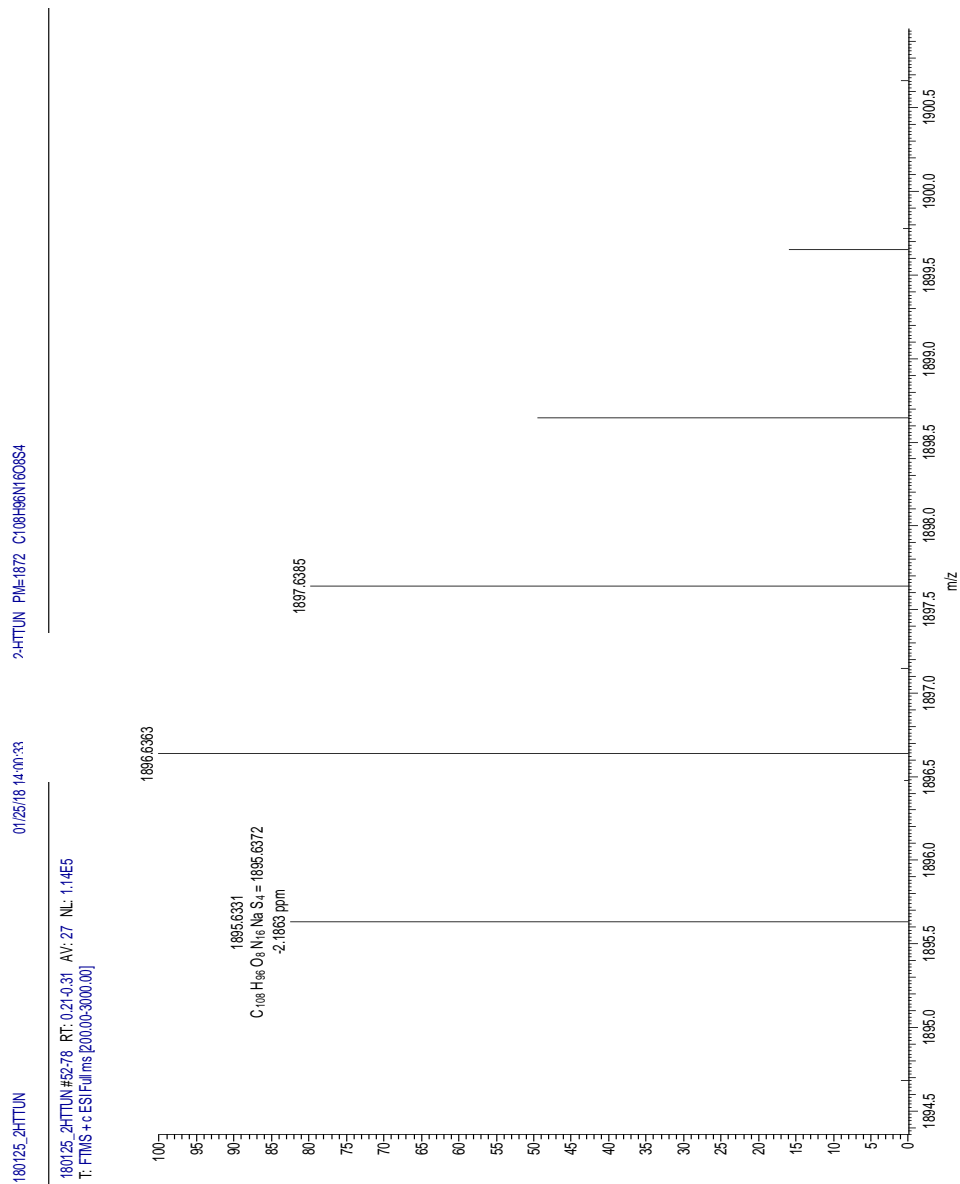

## 5.- Determination of the association constant by absorption titration.

Figure S2. The binding constant of II has been derived based on the Benesi–Hildebrand equation using absorption titration with (a)  $\text{Cu}^{2+}$ .

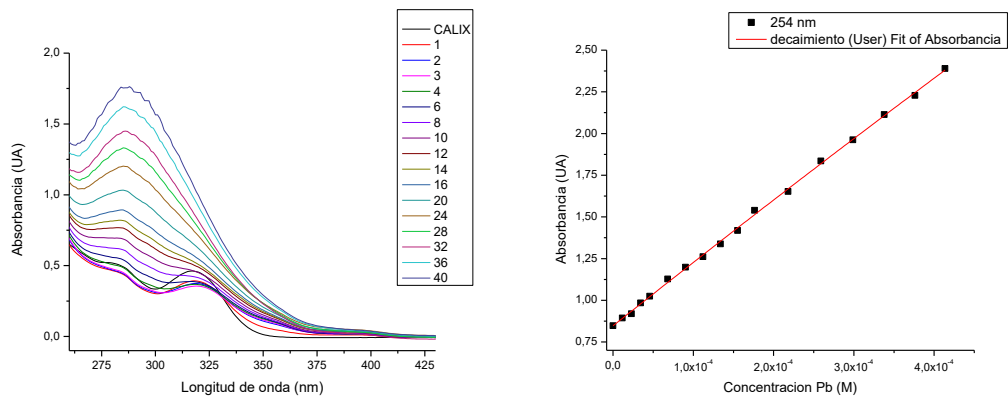

## 6.- Determination of the stoichiometry.

Figure S3. Continuous variation plot for receptor II from absorbance measurements in  $\text{CH}_3\text{CN}$ .

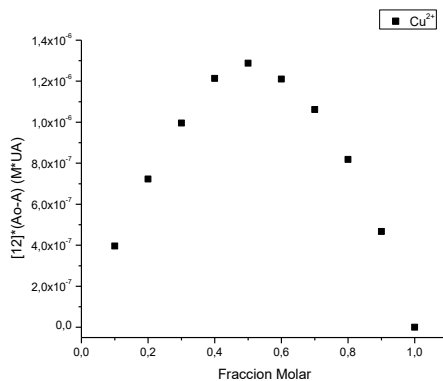

7.- Characterization of III; 25,27-bis[3-(6-(2-naphthamido)pyridin-2-thioureido)propyloxy]-26,28-dihydroxychalix[4]arene, cone.

Figure S1: Spectra for III: (a)  $^1\text{H}$  NMR; (b)  $^{13}\text{C}$  NMR; (c) FT-IR and (d) ESI-TOF.

(a)  $^1\text{H}$  NMR

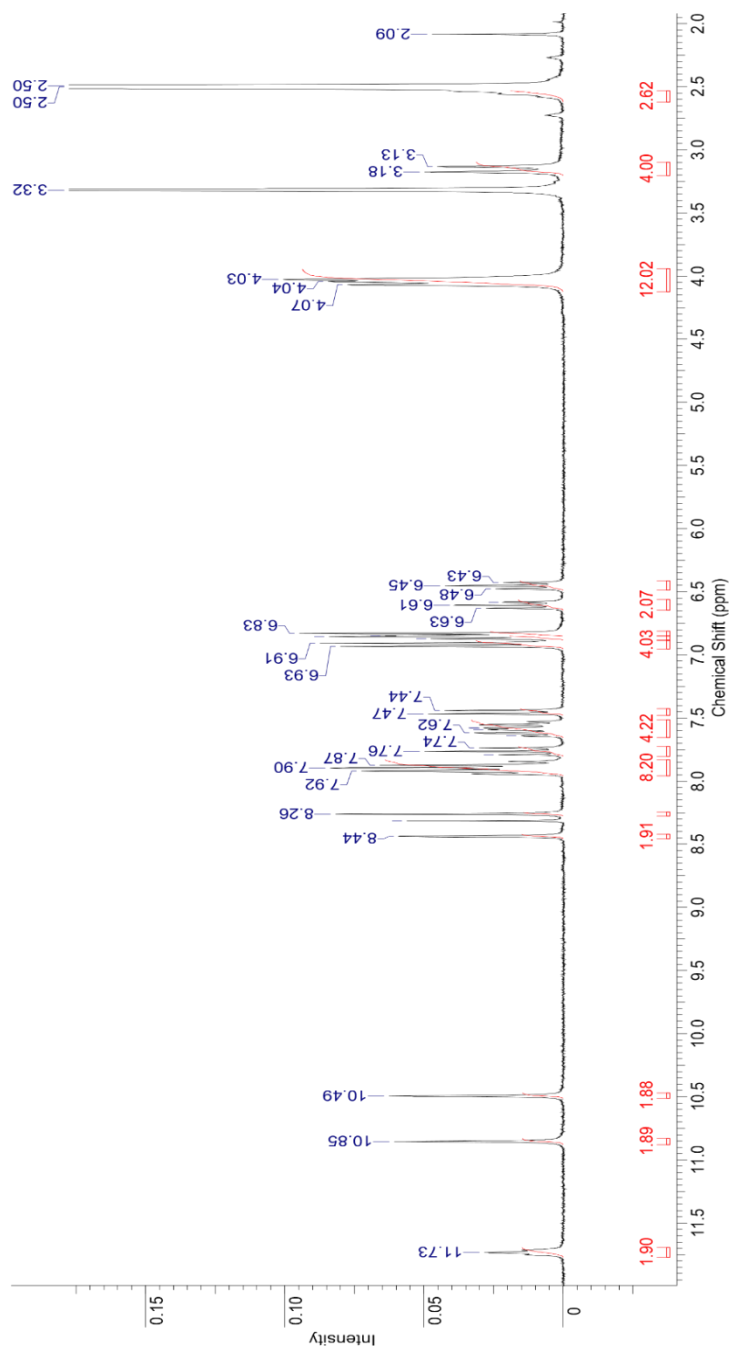

(b)  $^{13}\text{C}$  NMR

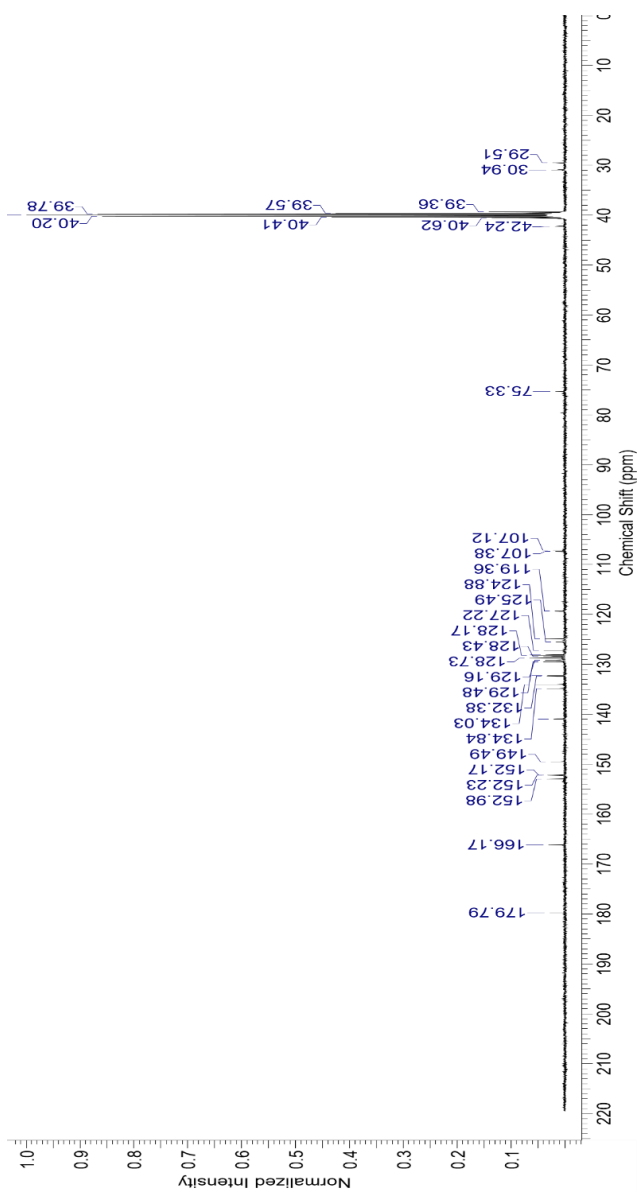

**(c) FT-IR**

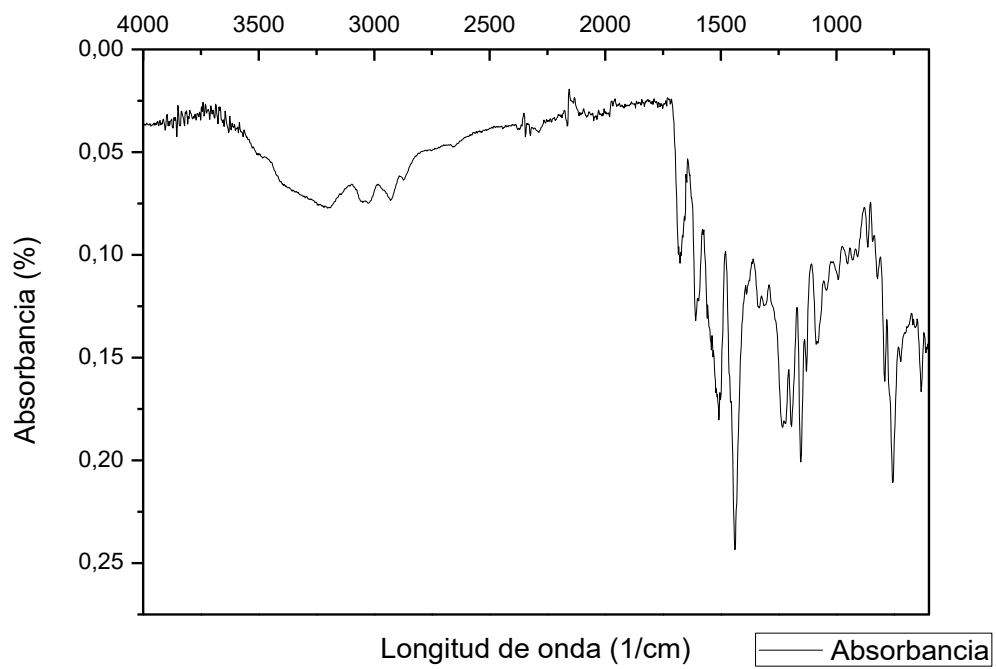

(d) ESI-TOF

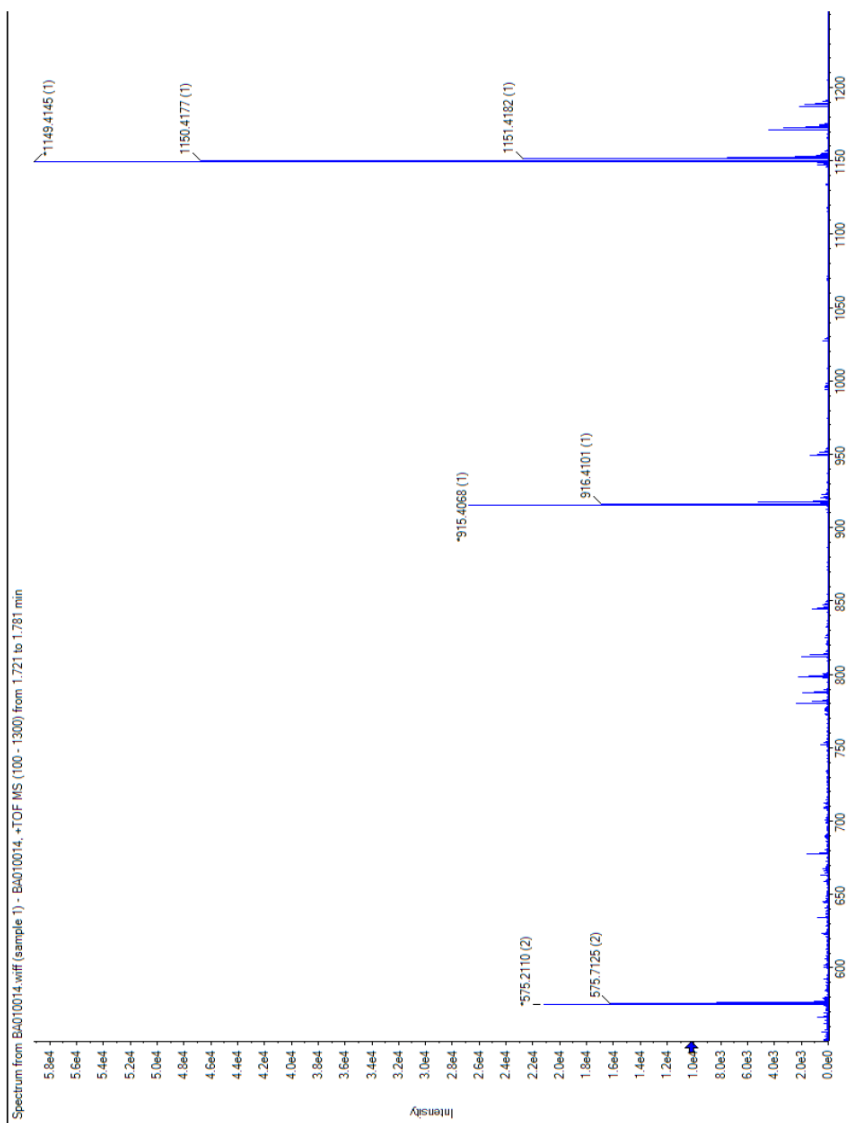

## 8.- Determination of the association constant by absorption titration.

Figure S2. The binding constant of III has been derived based on the Benesi–Hildebrand equation using absorption titration with  $\text{Cu}^{2+}$ .

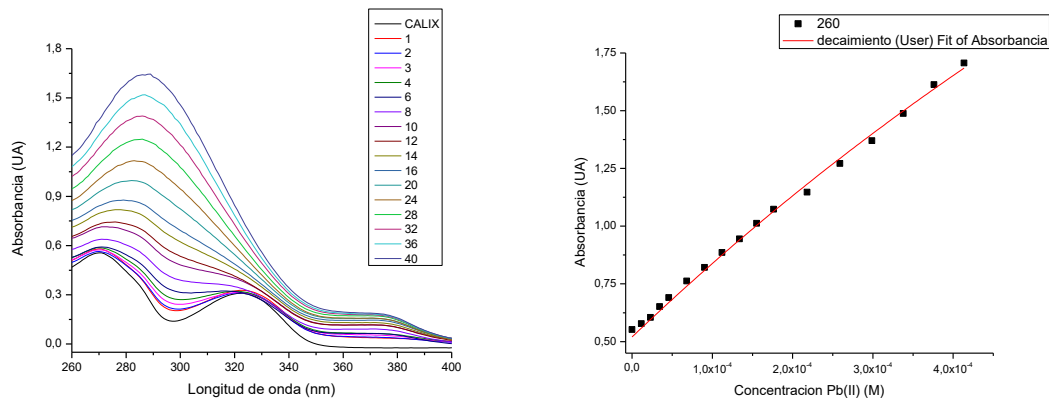

## 9.- Determination of the stoichiometry.

Figure S3. Continuous variation plot for receptor III from absorbance measurements in  $\text{CH}_3\text{CN}$ .

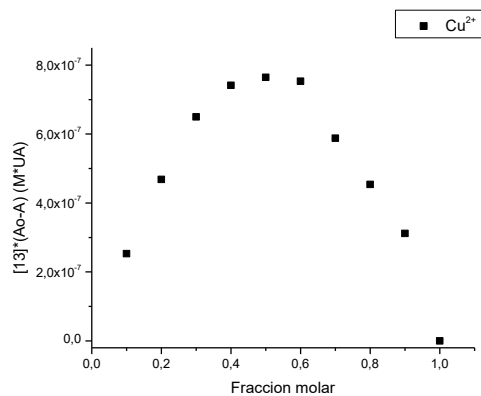

**10.- Characterization of IV; 5,11,17,23-tetra-tert-butyl-25,27-bis[3-(6-(N-diethylamino)-2-pyridinyl)-1,2,3-triazolo[1,5-a]pyridine)ethoxy]-26,28-dipropoxycalix[4]arene, cone.**

**Figure S1: Spectra for IV: (a) <sup>1</sup>H NMR; (b) FT-IR and (c) ESI-TOF.**

**(a) <sup>1</sup>H NMR**

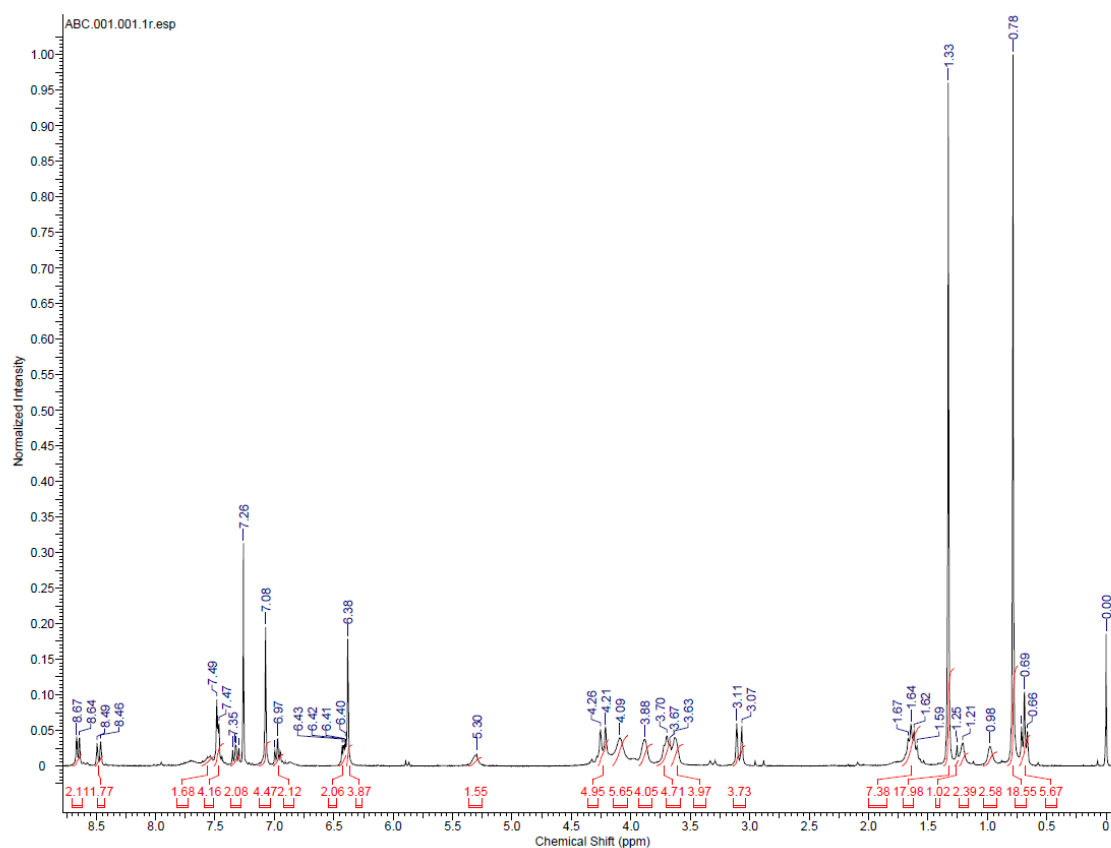

**(b) FT-IR**

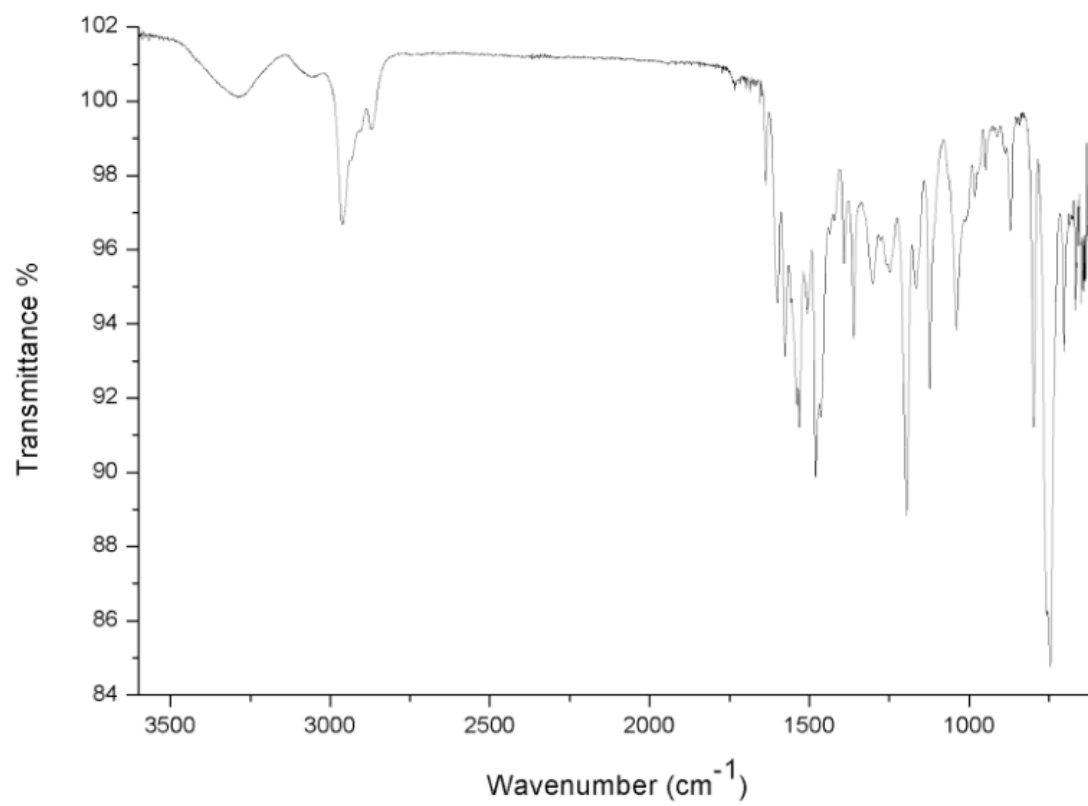

(c) ESI-TOF

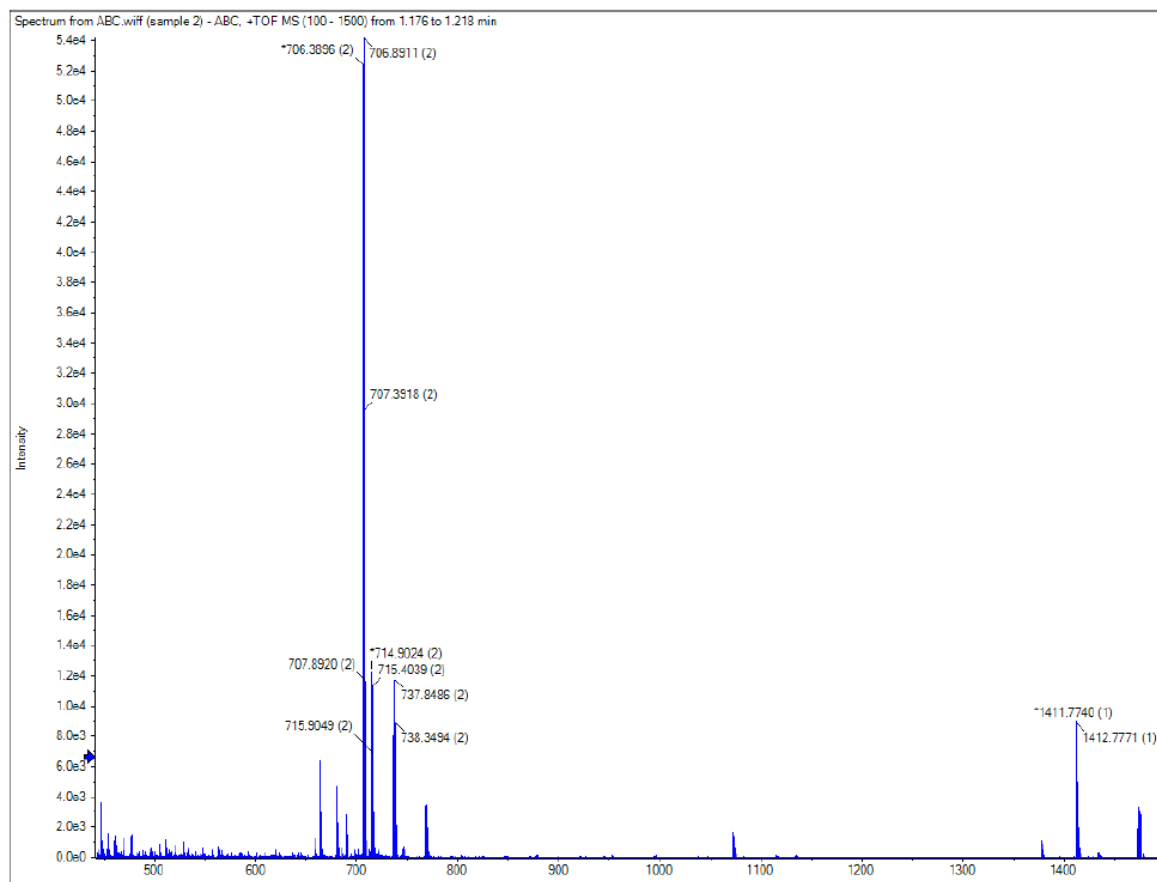

## 11.- Determination of the association constant by fluorescent titration.

Figure S2. The binding constant of IV has been derived based on the Benesi–Hildebrand equation using fluorescent titration with (a)  $\text{Ni}^{2+}$  and (b)  $\text{Cu}^{2+}$ .

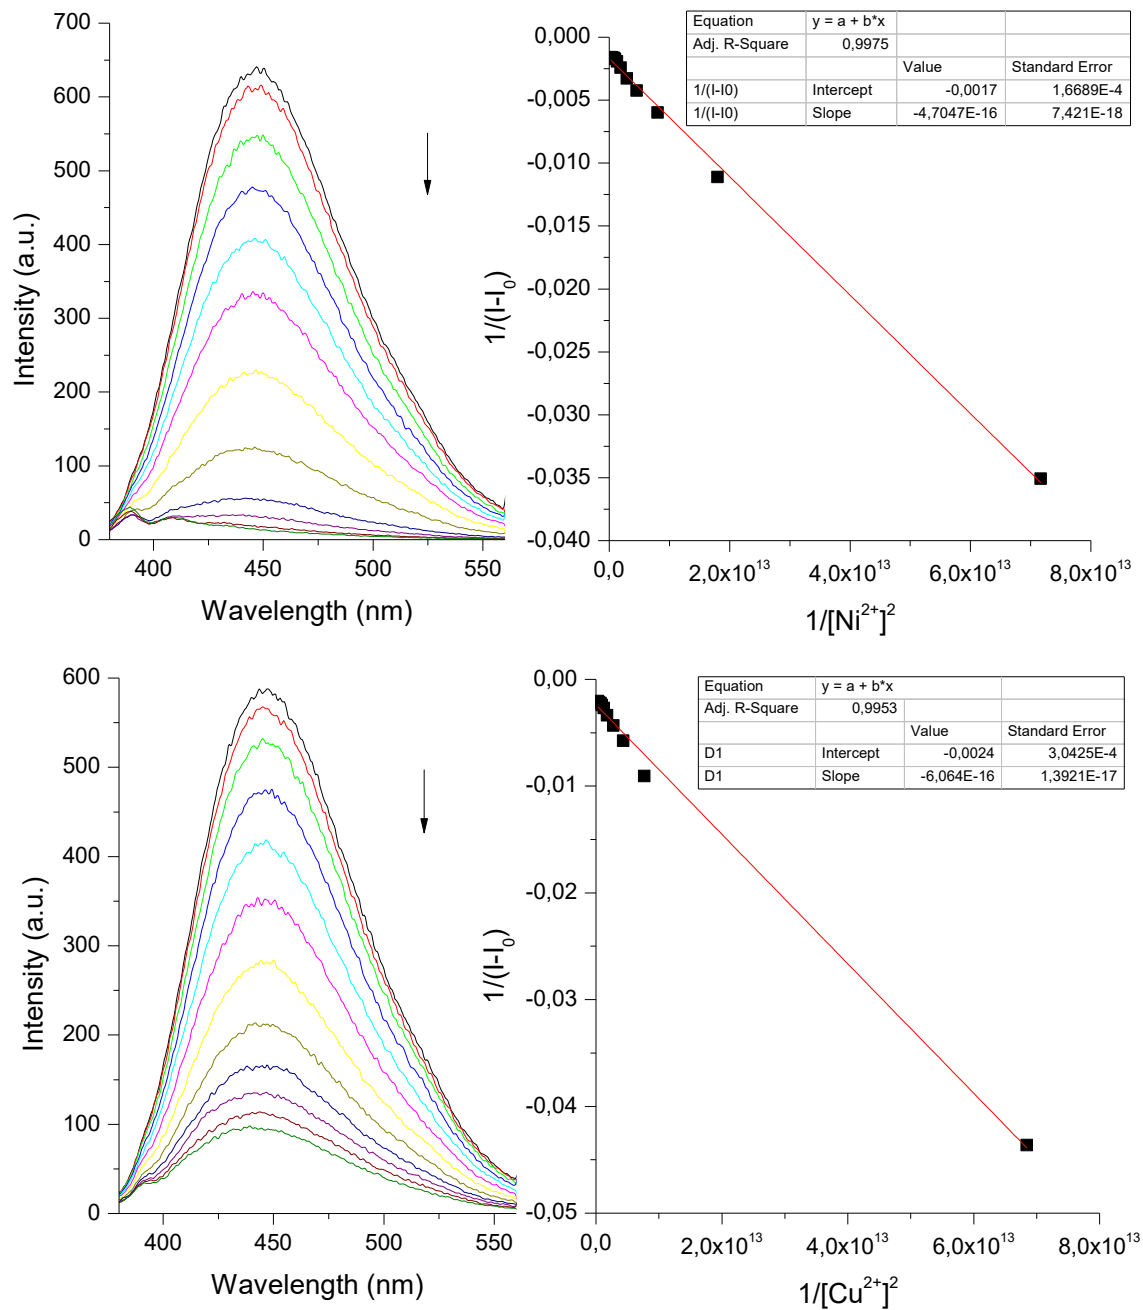

## 12.- Determination of the stoichiometry.

Figure S3. Continuous variation plot for receptor IV from fluorescence measurements at 450 nm in CH<sub>3</sub>CN. (a) Ni<sup>2+</sup>; (b) Co<sup>2+</sup> and (c) Cu<sup>2+</sup>.

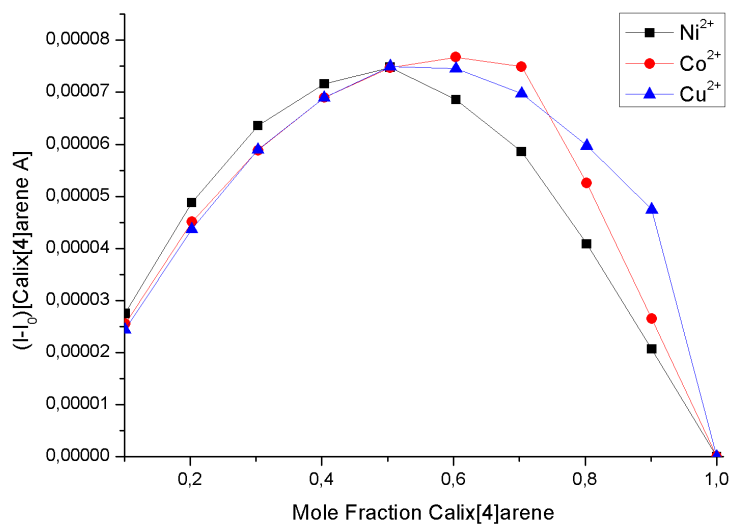

13.- Characterization of V; 5,11,17,23-tetra-tert-butyl-25,27-bis[3-(6-(N-diethylamino)-2-pyridinyl)-1,2,3-triazolo[1,5-a]pyridine)ethoxy]-26,28-dipropoxycalix[4]arene, 1,3-alternate.

Figure S1: Spectra for V: (a)  $^1\text{H}$  NMR; (b) FT-IR and (c) ESI-TOF.

(a)  $^1\text{H}$  NMR

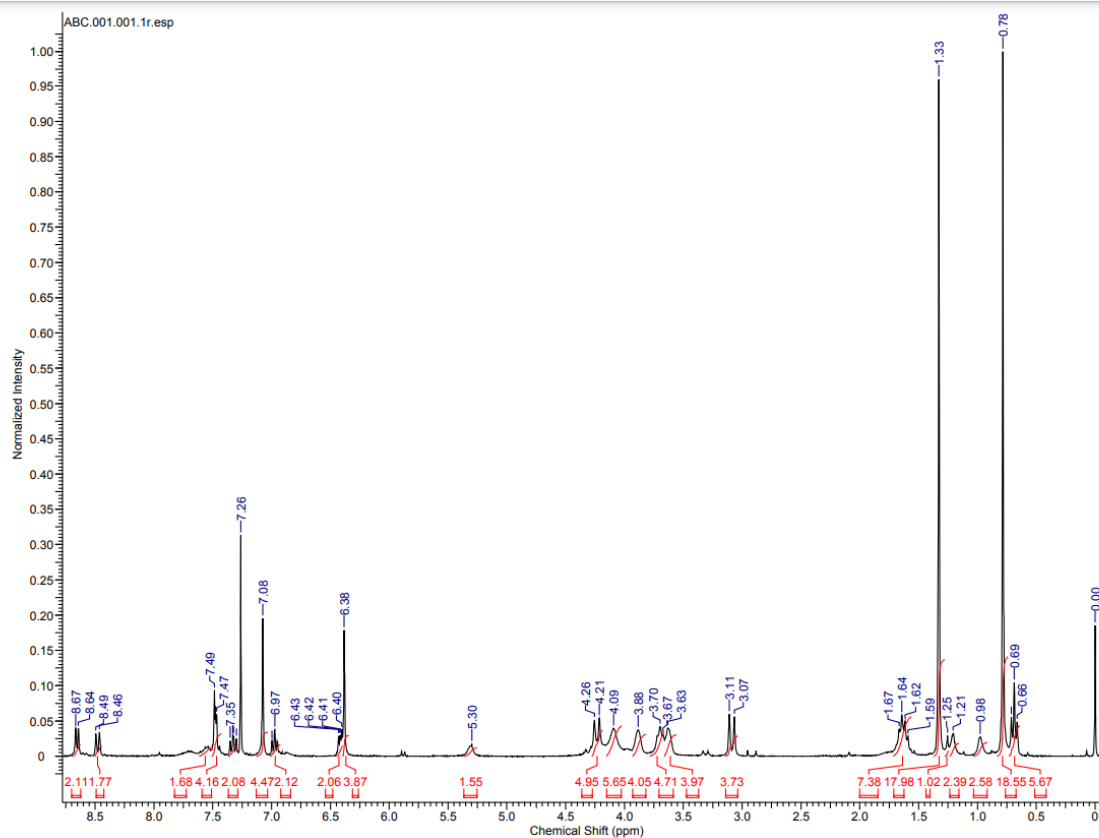

**(b) FT-IR**

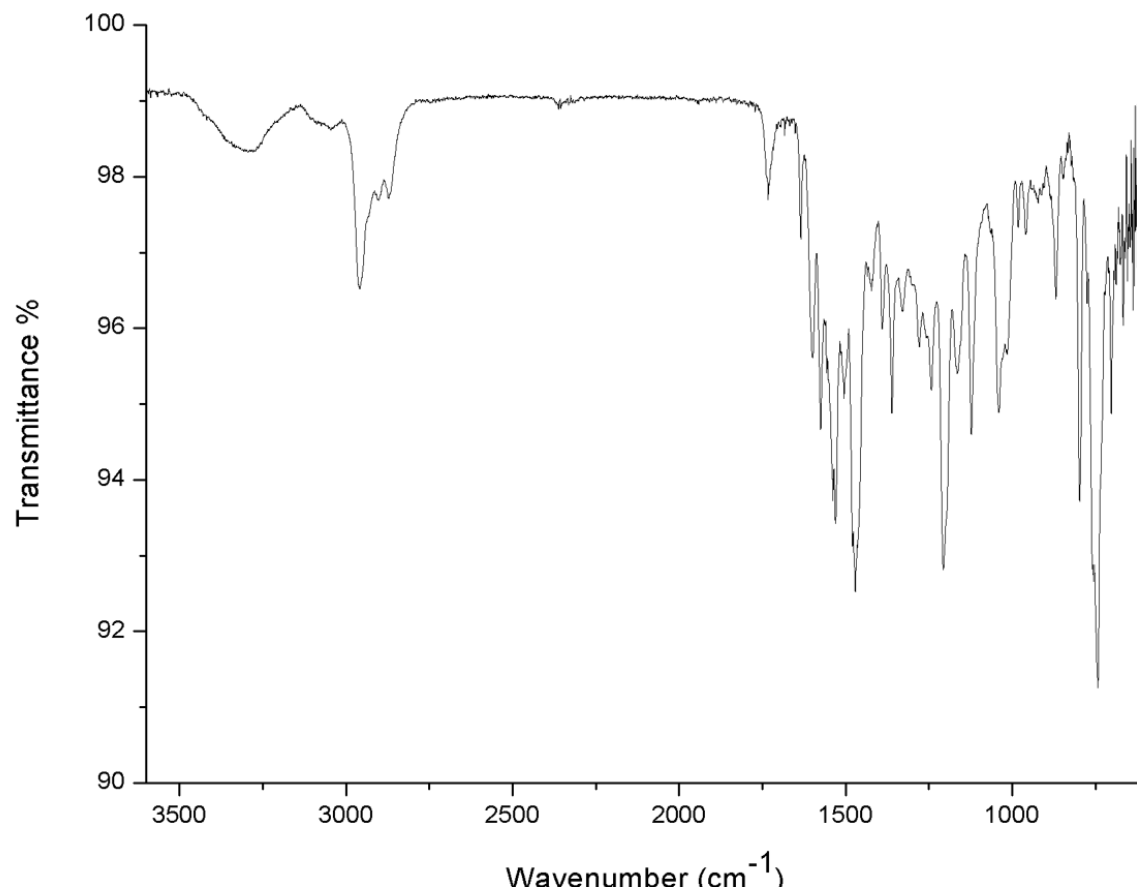

### (c) ESI-TOF

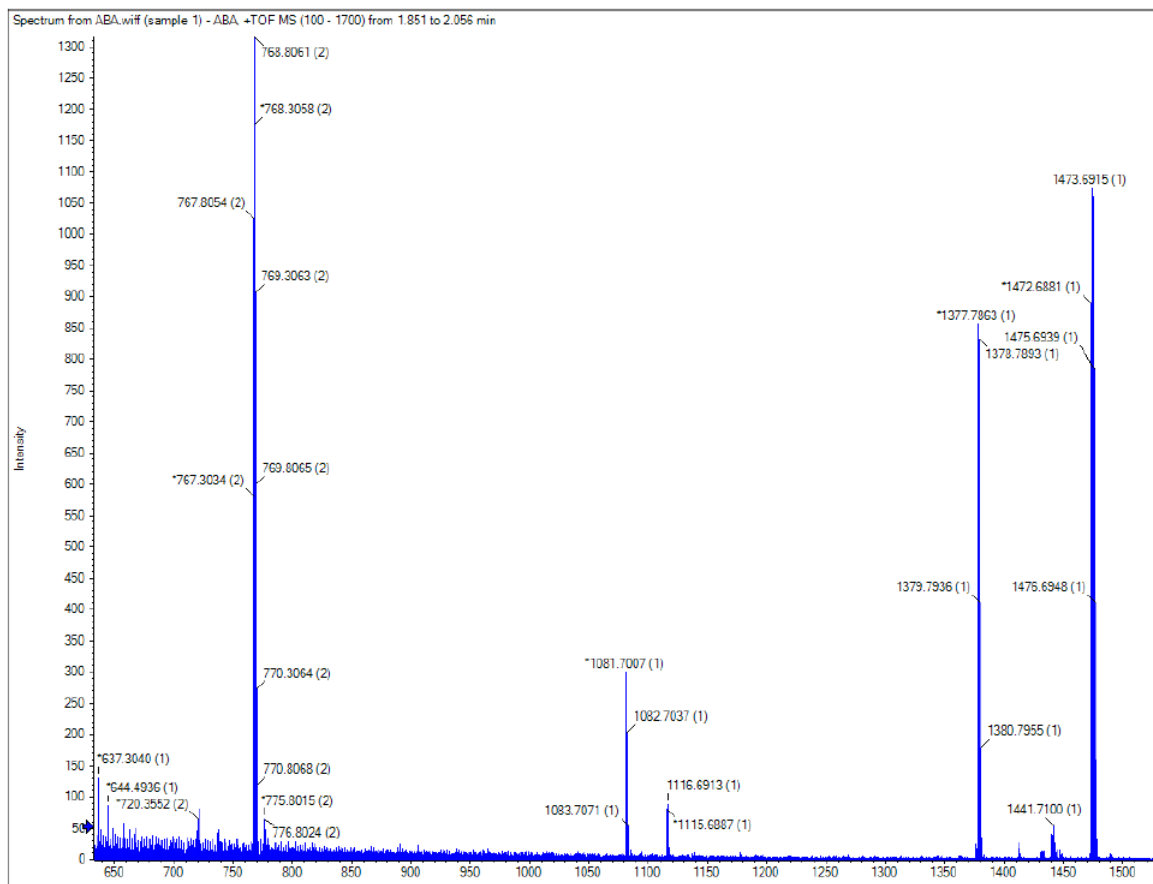

#### 14.- Determination of the association constant by fluorescent titration.

Figure S2. The binding constant of V has been derived based on the Benesi–Hildebrand equation using fluorescent titration with (a)  $\text{Ni}^{2+}$  and (b)  $\text{Cu}^{2+}$ .

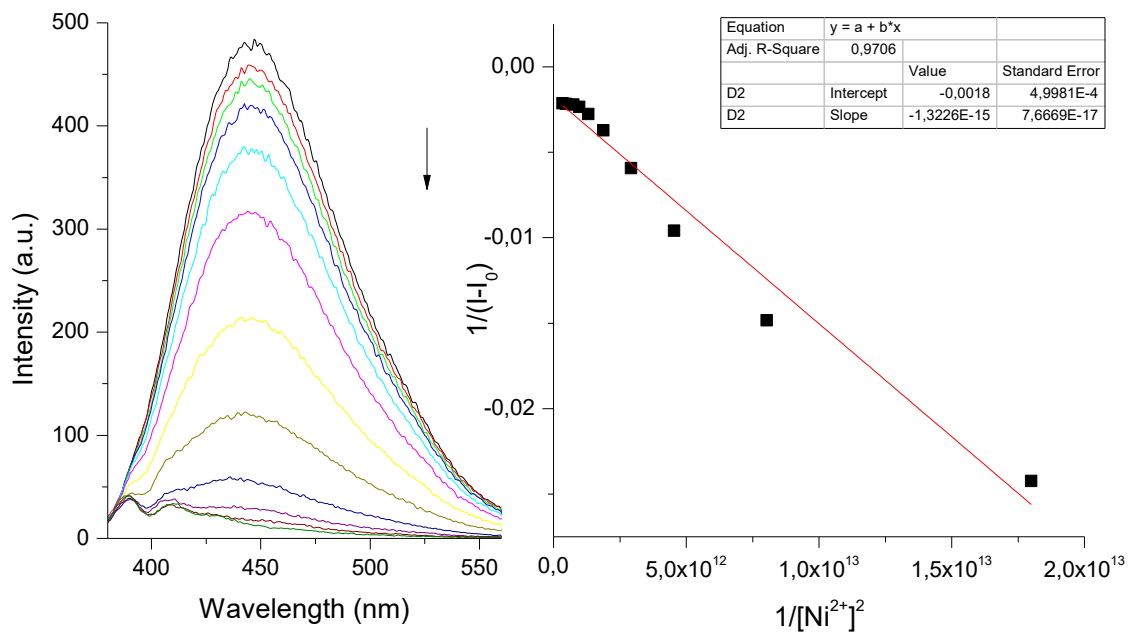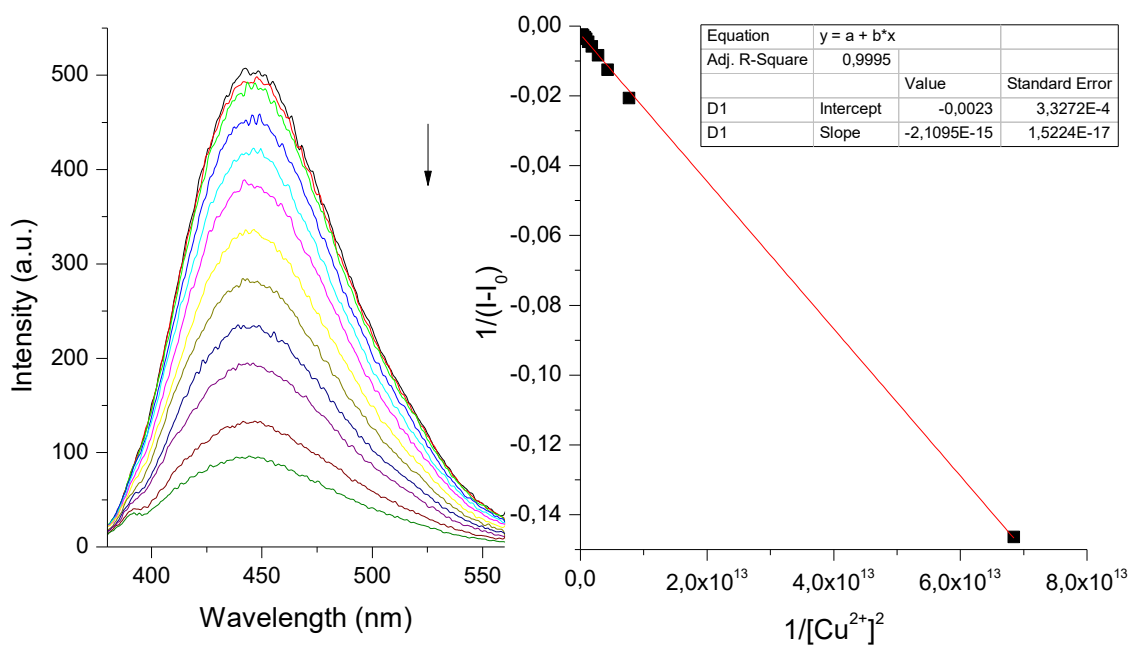

}

### 15.- Determination of the stoichiometry.

Figure S3. Continuous variation plot for receptor V from fluorescence measurements at 450 nm in CH<sub>3</sub>CN. (a) Ni<sup>2+</sup>; (b) Co<sup>2+</sup> and (c) Cu<sup>2+</sup>.

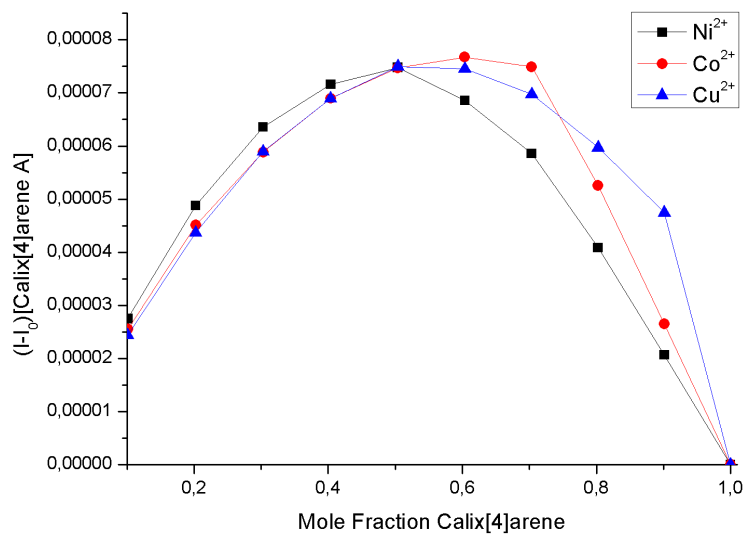

Supplement: Supplementary file 1 [file supplementary]
